# Supplementary material for: High performance electrochemical CO2 reduction over Pd decorated cobalt containing nitrogen doped carbon
Source: Royal Society of Chemistry journal article supplement (doi:10.1039/d4ra01641f), 2024-01-01
Supplement: d4ra01641f1.pdf [file d4ra01641f1.pdf]

## Supplementary information

### High performance electrochemical CO<sub>2</sub> reduction over Pd decorated cobalt containing nitrogen doped carbon

Shayan Gul,<sup>1</sup> Fatima Nasim,<sup>1</sup> Waheed Iqbal <sup>1</sup>, Amir Waseem <sup>1</sup>, and Muhammad Arif Nadeem<sup>1,2\*</sup>

<sup>1</sup>Catalysis and Nanomaterials Lab 27, Department of Chemistry, Quaid-i-Azam University, Islamabad 45320, Pakistan

<sup>2</sup>Pakistan Academy of Sciences, 3-Constitution Avenue Sector G-5/2, Islamabad, Pakistan.

\*Contact details:

M.A.N; [manadeem@qau.edu.pk](mailto:manadeem@qau.edu.pk)

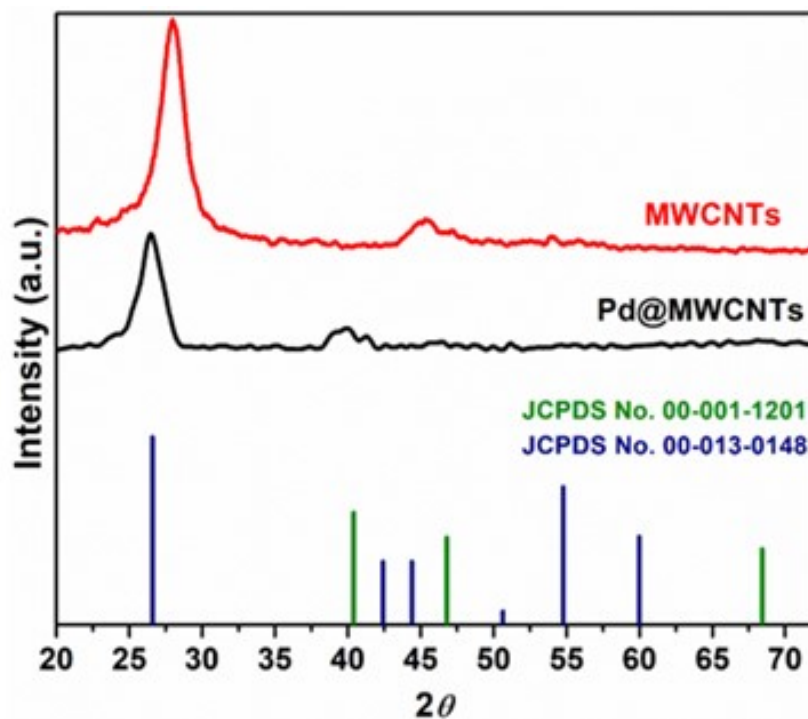

Figure S1. PXRD pattern of MWCNTs and Pd@MWCNTs

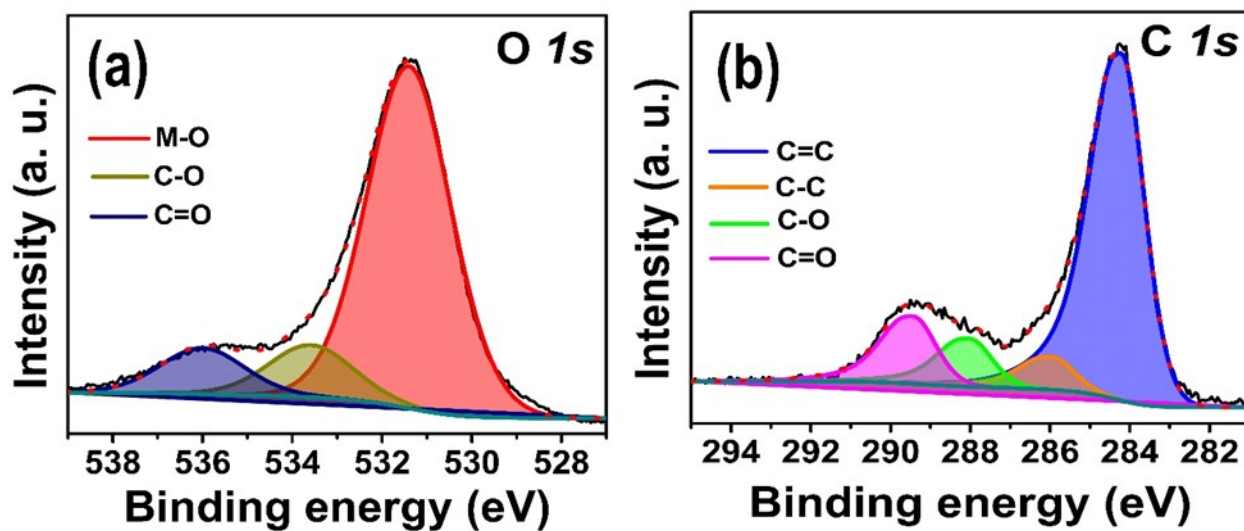

Figure S2. XPS spectrum of (a) O 1s and (b) C 1s

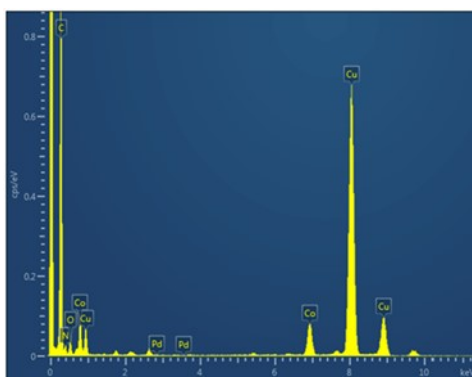

Figure S3. EDX analysis of Pd@CoO<sub>x</sub>/NC1

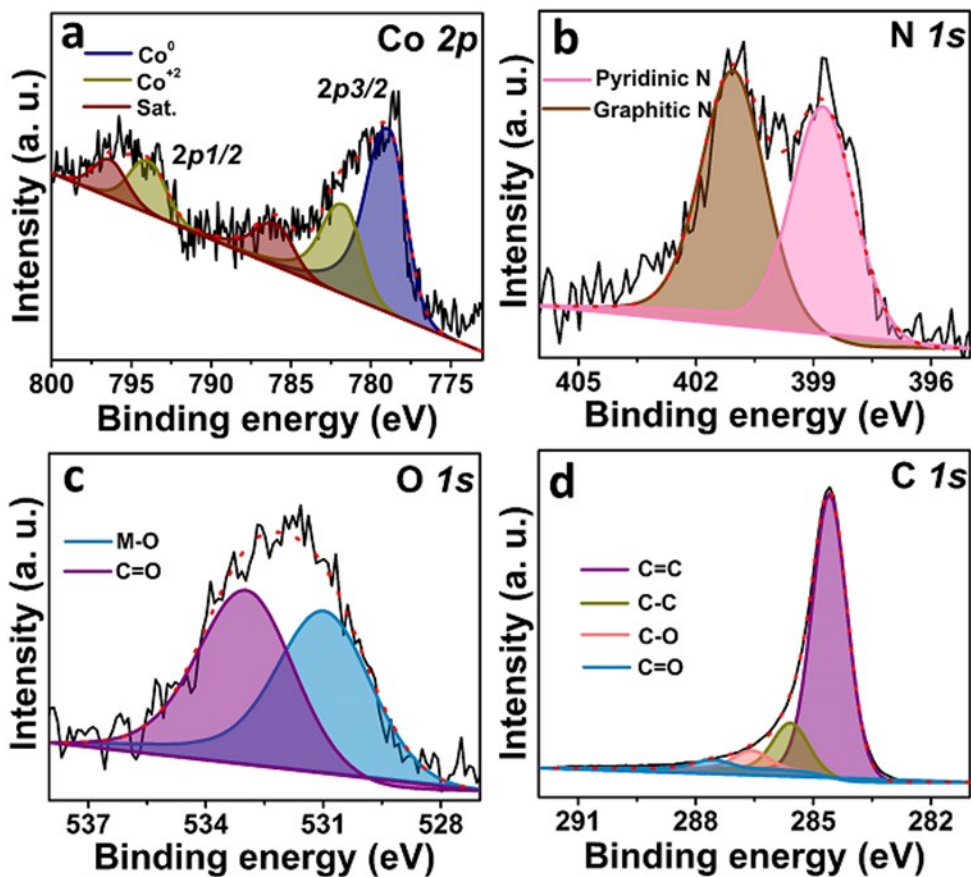

Figure S4. XPS spectrum of CoOx/NC (a) Co 2p (b) N 1s (c) O 1s (d) C 1s

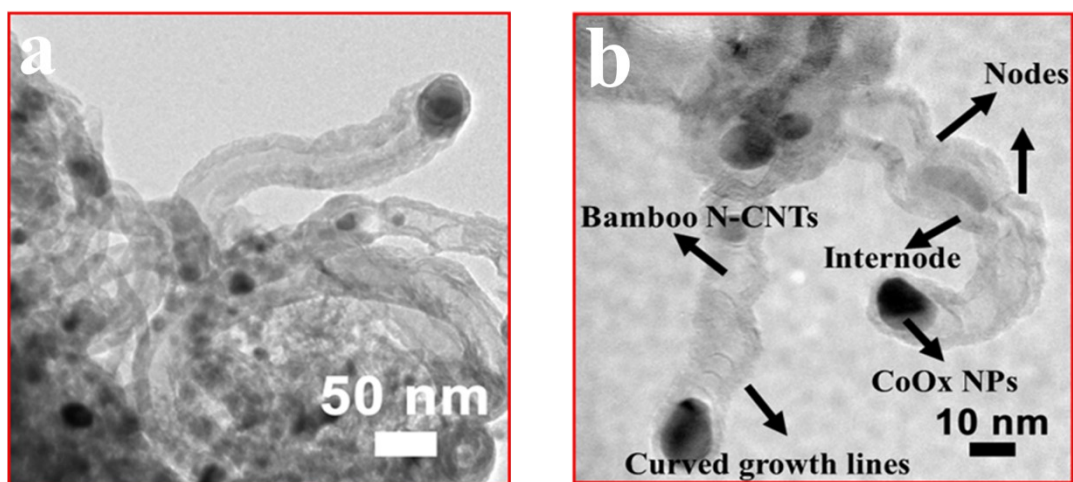

Figure S5. HRTEM image of CoOx/NC (a) 50 nm (b) 10 nm

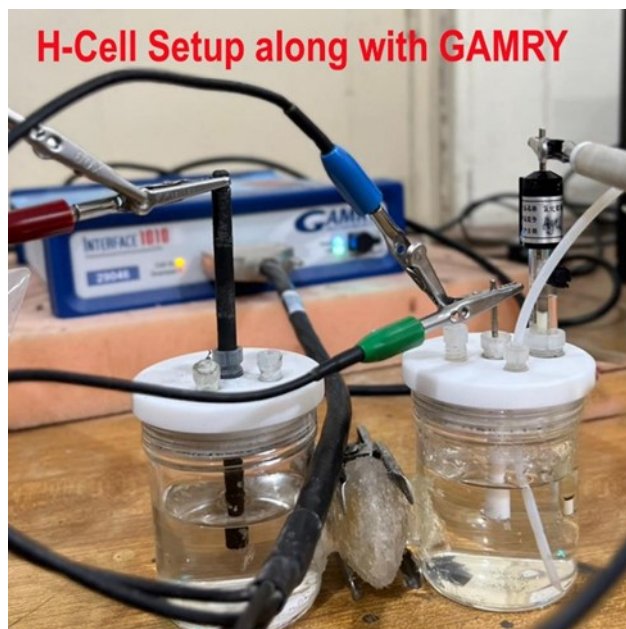

**Figure S6.** H-cell setup along with GAMRY instrument used for the CO<sub>2</sub> reduction reaction

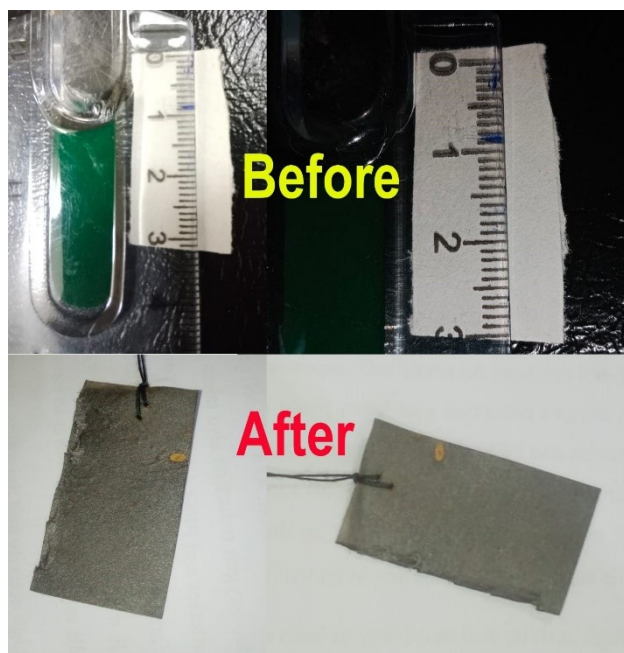

**Fig. S7.** Visible color change of PdCl<sub>2</sub> Strips: pre- and post-chemical reaction

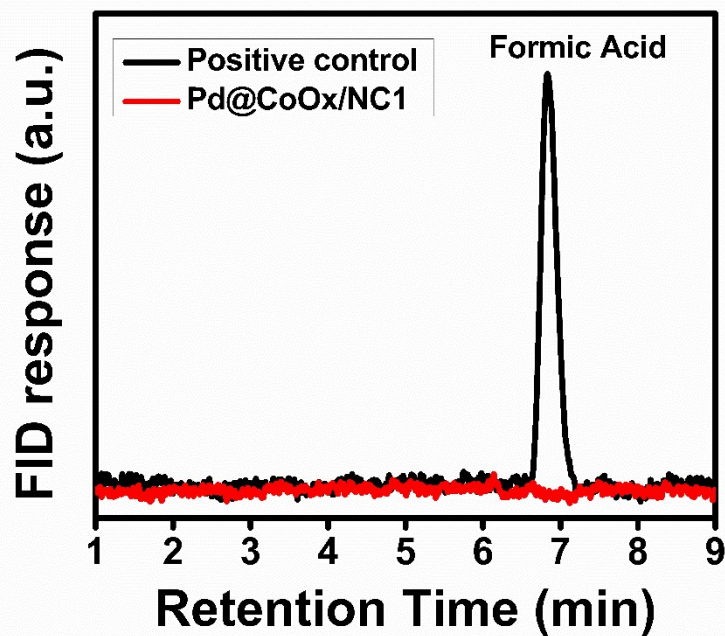

Fig.8. HS-GCFID chromatogram reveals no formic acid peak at 6.8 min Rt during catalytic activity, confirming Pd@CoOx/NC1 catalyst's CO selectivity.

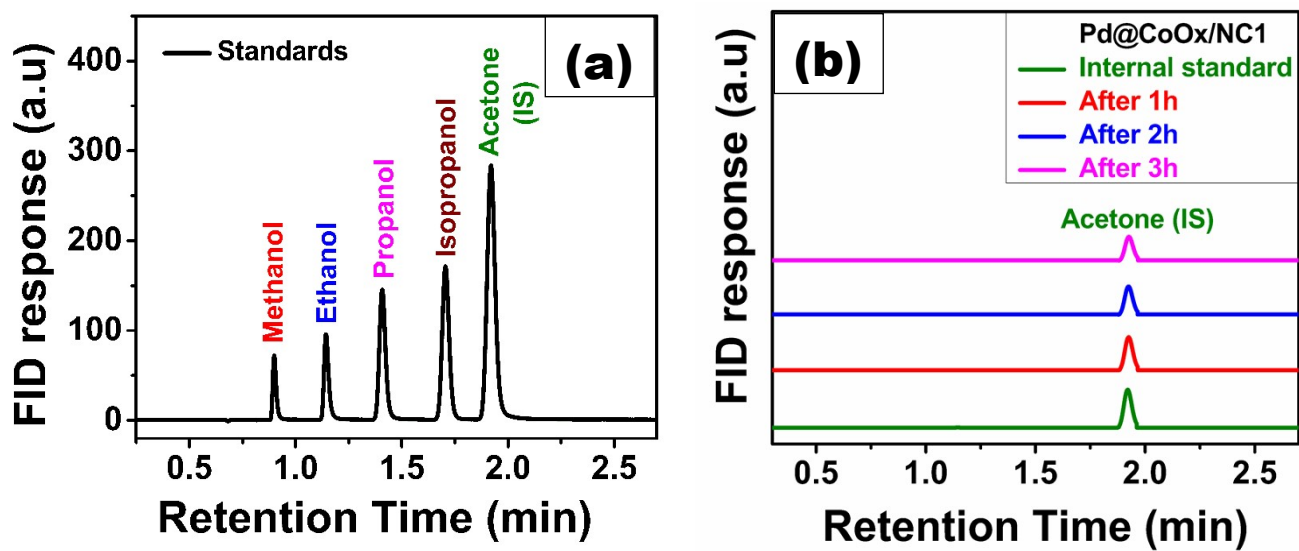

Fig. S9. HS-GCFID chromatogram (a) standards along with IS (b) Pd@CoOx/NC1 at different time durations.

**Table S1.** Powder XRD analysis of Pd@CoO<sub>x</sub>/NC1 electrocatalyst

| <b>Miller indices (hkl)</b> | <b>2 Theta (deg)</b> | <b>cell parameter (a) nm</b> | <b>d-spacing (nm)</b> |
|-----------------------------|----------------------|------------------------------|-----------------------|
| 111                         | 39.60                | 0.39                         | 0.2274                |
| 200                         | 44.85                | 0.40                         | 0.2019                |
| 220                         | 68.10                | 0.39                         | 0.1379                |
